# Supplementary material for: An integrated paper-based microfluidic platform for screening of early-stage Alzheimer's disease by detecting Aβ42
Source: Royal Society of Chemistry journal article supplement (doi:10.1039/d4lc00748d), 2025-01-01
Supplement: d4lc00748d1.pdf [file d4lc00748d1.pdf]

**Supplementary Information for**

**An Integrated Paper-based Microfluidic Platform for**

**Screening of Early-Stage Alzheimer's Disease by Detecting**

**of A $\beta$ 42**

Sixuan Duan<sup>1,2‡</sup>, Tianyu Cai<sup>1,2‡</sup>, Lizhe Chen<sup>1,2</sup>, Xiaoyan Wang<sup>1,2</sup>, Shuailong Zhang<sup>3</sup>,

Bing Han<sup>1,2</sup>, Eng Gee Lim<sup>1,2\*</sup>, Kai Hoettges<sup>2</sup>, Yong Hu<sup>4</sup>, Pengfei Song<sup>1,2\*</sup>

<sup>1</sup> School of Advanced Technology, Xi'an Jiaotong-Liverpool University, Suzhou, China, 215000

<sup>2</sup> Department of Electrical and Electronic Engineering, University of Liverpool, Liverpool, UK,

L69 7ZX

<sup>3</sup> School of Integrated Circuits and Electronics, Beijing Institute of Technology, Beijing, 100081

<sup>4</sup> School of Mechanical and Aerospace Engineering, Jilin University, Changchun, China, 130022

\*Corresponding author:

Pengfei Song: pengfei.song@xjtlu.edu.cn

Eng Gee Lim: enggee.lim@xjtlu.edu.cn

Figure S1. Additional features and mechanisms of the paper-based microfluidic chip device, along with fabrication process

Figure S2. Illustration of preparations for paper-based chips before use.

Figure S3. Design of appearance, functions, and interactions of the RAPID platform, along with fabrication and assembling process.

Figure S4. Design of companioned Android-based APP for interacting with the RAPID platform and communicating with other terminals.

Figure S5. Results of experiment evaluating infereference of plasma background color to colorimetric assay.

Figure S6. Illustration of steps for agreement analysis between the clinical performance of the RAPID and that of the gold standard commercial ELISA.

Table S1. Design and fabrication parameters of paper-based chip.

Table S2. Design and fabrication parameters of RAPID platform.

Table S3. Models of electronic components used in the RAPID platform.

Table S4. Raw data for results of specimens tested by RAPID and commercial ELISA.

Table S5. One-test cost of the paper-based chip.

Table S6. Cost of the RAPID platform.

Table S7. Comparison between our RAPID and the commercial ELISA.

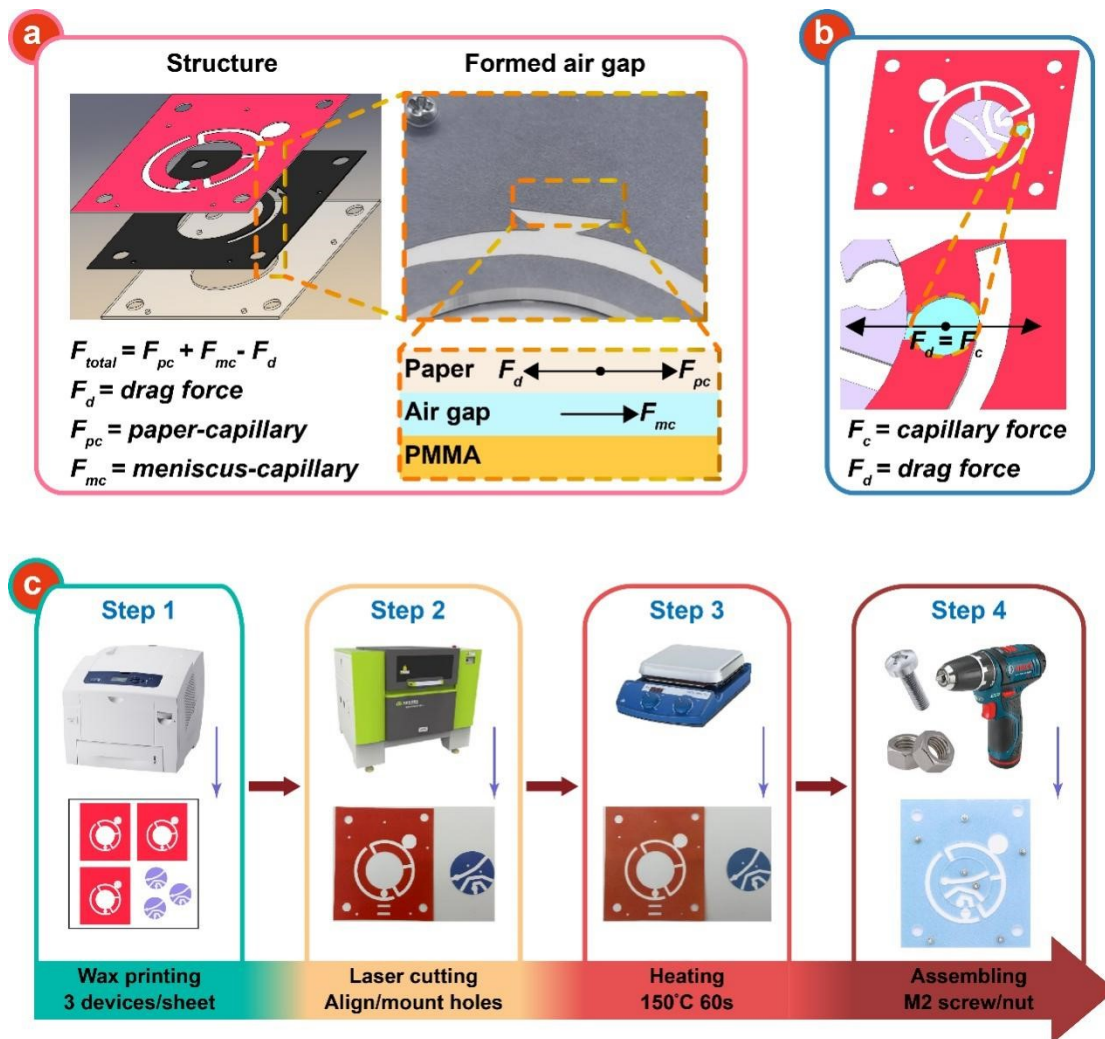

Figure S1. Additional features and mechanisms of the paper-based microfluidic chip device, along with fabrication process. (a) The structure and mechanism for flow speeding up. An additional meniscus-capillary force was introduced by the air gap formed between paper channels and supporting PMMA separated by a carved wax paper. (b), Illustration of stop mechanism of the reagents flushed into the test zone, utilizing the equilibrium between the liquid's viscous drag force and the capillary force of both paper and air gap. (c), The fabrication process of the paper-based device. Step 1: Transfer designed patterns to the paper by wax printing; Step 2: detach patterns and drill align/mount holes through laser cutting; Step 3: heat the paper to form hydrophobic boundaries by melting printed wax throughout paper; Step 4: assemble paper and two layers of PMMA cases with M2 screws and nuts.

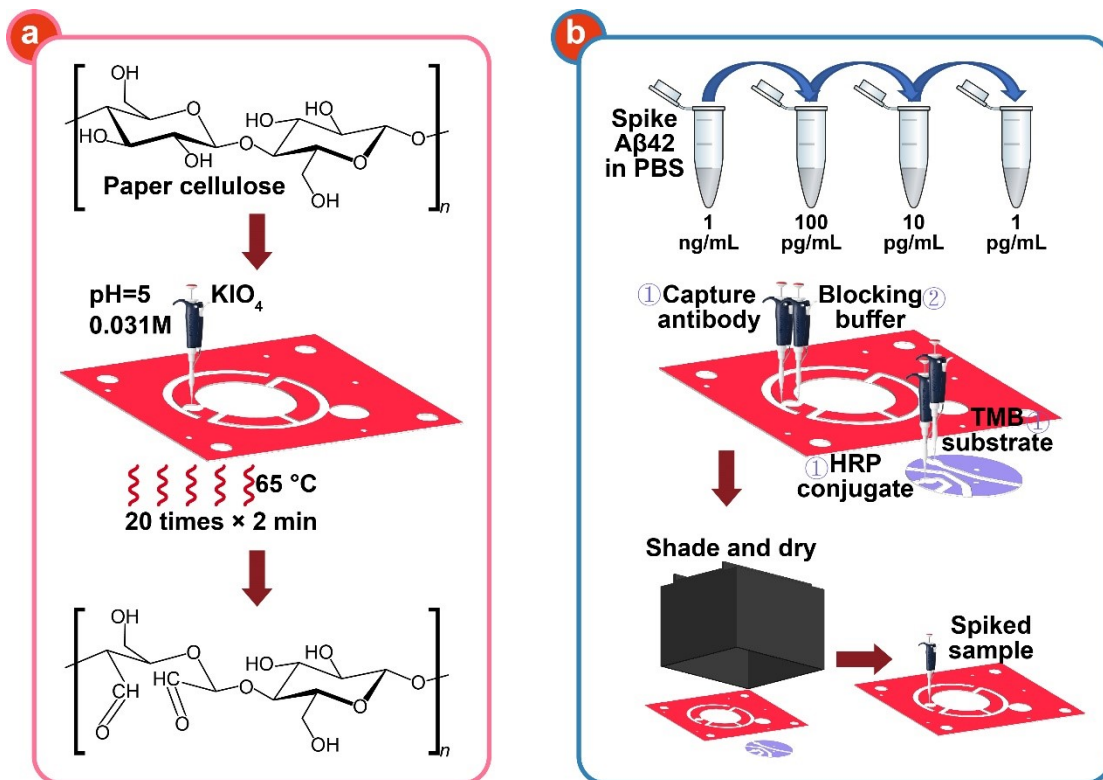

Figure S2. Illustration of preparations for paper-based chips before use. (a) Biofunctionalization of the test zone by potassium periodate (KIO<sub>4</sub>) to strengthen binding between proteins and paper: To perform this process, we spotted KIO<sub>4</sub> aqueous solution (0.031M, pH=5) with 1.5 μL under 65 °C, repeating every 2 min for 20 times. Hydroxyl groups on cellulose paper changed to aldehyde groups, capable to achieve strong binding of proteins via covalent bonds. (b) Preparation of spiked samples for obtaining calibration curve and loading reagents on the paper-based chip: Firstly, capture antibody (3 μL) was added into the test zone, while HRP conjugated antibody (3 μL) and TMB substrate (3 μL) were added into storage 1 and 2 respectively, after which paper-based chip was dried for 10 min under room temperature; Secondly, blocking buffer (3 μL) was added into the test zone and then dried for 10 min under room temperature; Thirdly, spiked sample (3 μL) was added into the test zone and then dried for 10 min under room temperature. The paper-based chip was shaded by a 3D printed apparatus to avoid light decomposition of TMB substrate during all drying steps.

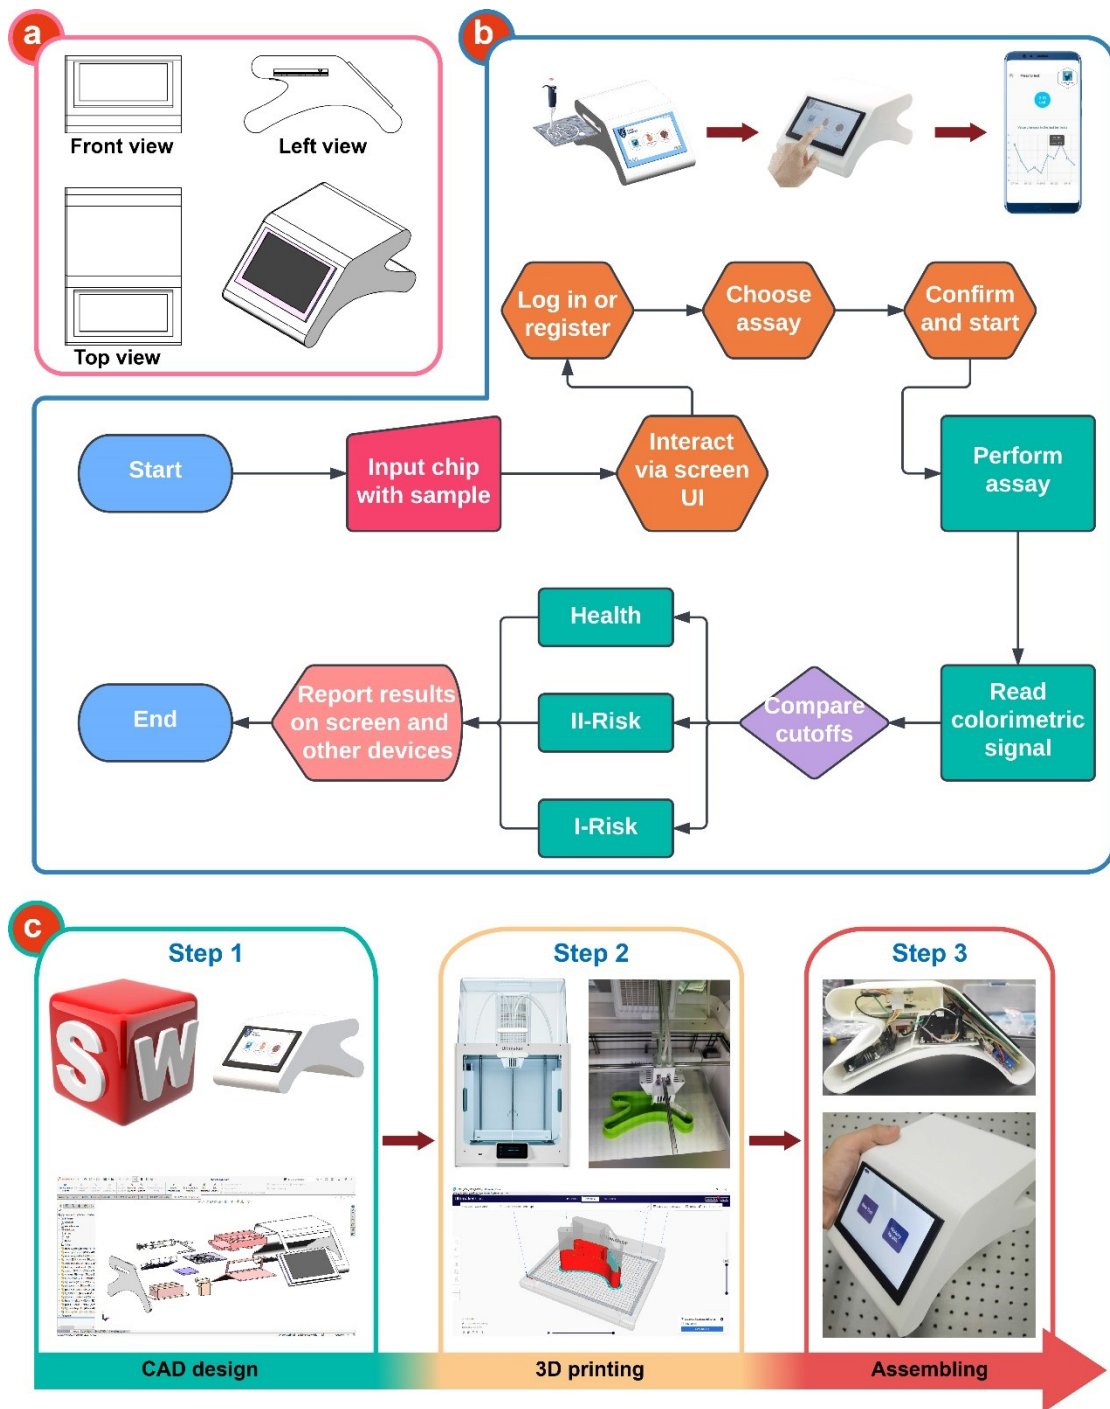

Figure S3. Design of appearance, functions, and interactions of the RAPID platform, along with fabrication and assembling process. (a), Three-view drawing of the appearance of the RAPID platform. (b), Flowchart of interactions between users and the RAPID platform. (c), Fabrication and assembling process of the RAPID platform. Step 1: Computer-aided design (CAD) design for the appearance and structure of the RAPID platform by Solidworks; Step 2: Fabrication of shells and supporting-frame structures of the RAPID platform by 3D printing; Step 3: Assembling of 3D-printing structures with electronic components: microcontroller, screen, sensor, etc.

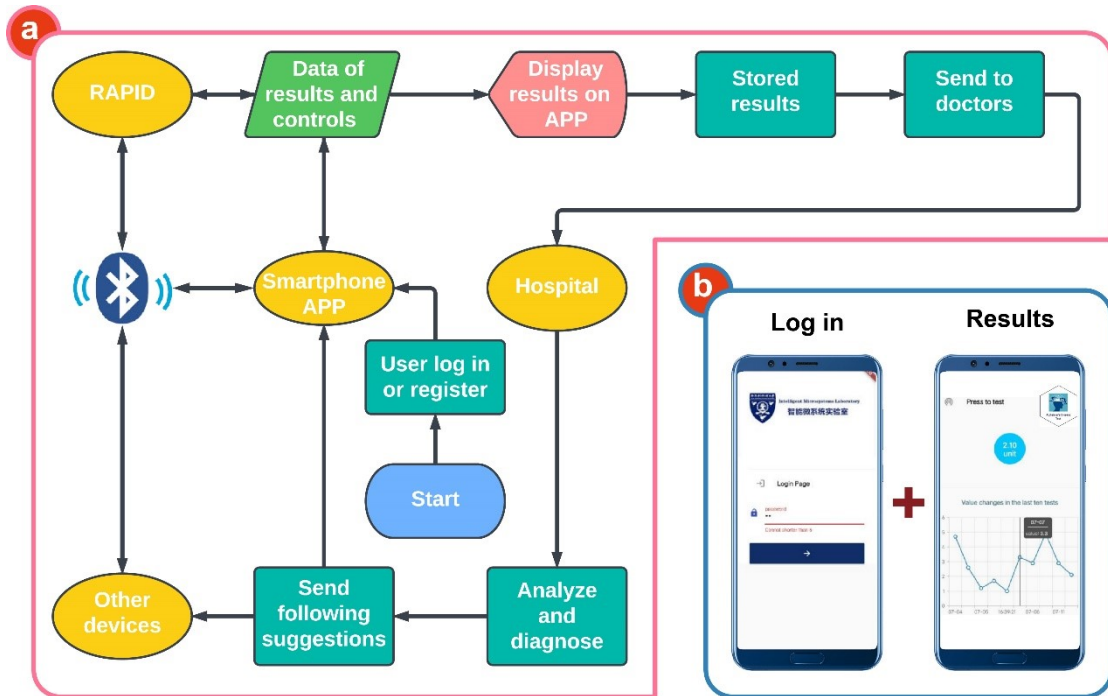

Figure S4. Design of companioned Android-based APP for interacting with the RAPID platform and communicating with other terminals. (a) Flowchart of the companioned Android-based APP: The APP connects the RAPID platform through Bluetooth to control testing and obtain results, where the results can also be transmitted to other kinds of (smart-mobile) devices by Bluetooth; It can also send the results to the hospital to obtain doctor’s diagnosis and follow suggestions. (b) Log-in and results interface (along with recent history data, which presented by a curve of the target over time) of the Android-based APP.

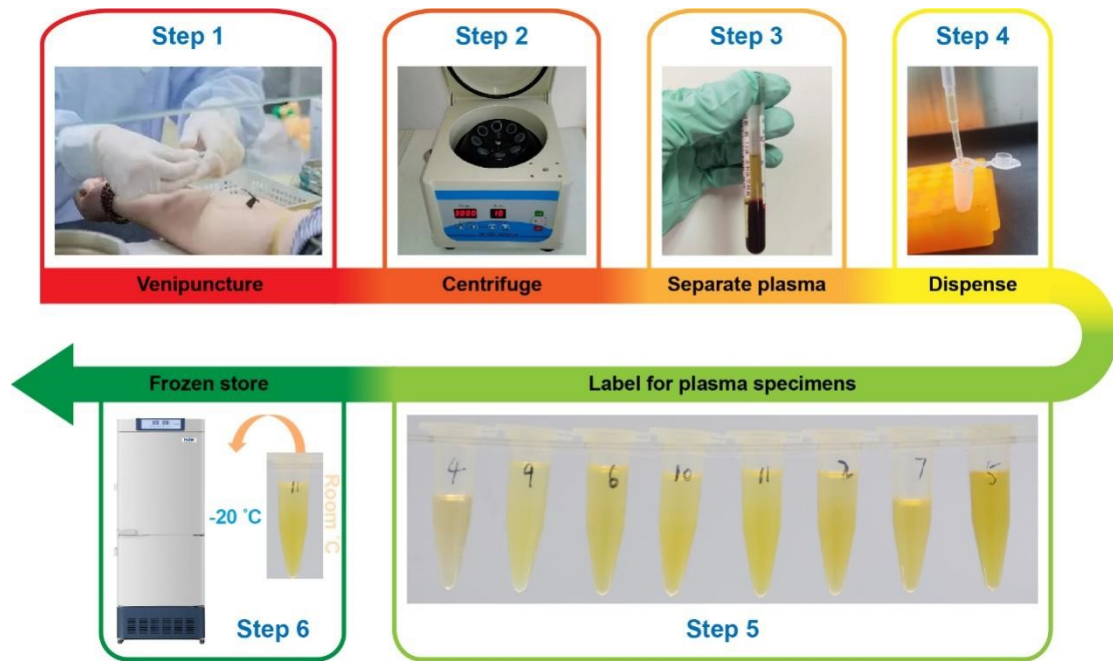

Figure S5. Results of an experiment evaluating interference of plasma background color to colorimetric assay.

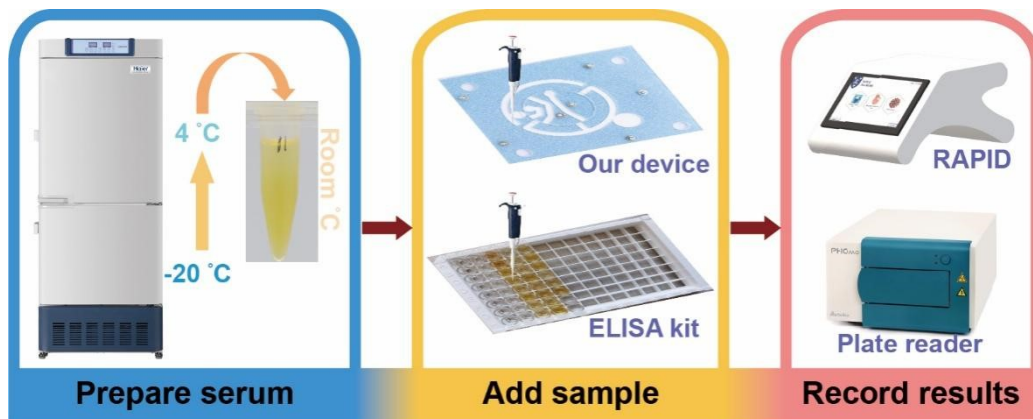

Figure S6. Illustration of steps for agreement analysis between the clinical performance of the RAPID and that of the gold standard commercial ELISA.

Table S1. Design and fabrication parameters of paper-based chip.

| Design                  |                                          | Fabrication |                              |                                  |
|-------------------------|------------------------------------------|-------------|------------------------------|----------------------------------|
| Overall dimensions      | 89 mm × 78 mm × 5 mm<br>(L×W×H)          |             | Wax printer                  | Xerox 8580DN                     |
| Valve diameter          | 34 mm                                    |             | Laser cutter                 | Han's Yueming<br>CMA0604-B-A     |
| Channel width           | 2.8 mm                                   |             | Laser parameter<br>for paper | Intensity: 10%<br>Speed: 50 mm/s |
| Overlap width           | 2 mm                                     |             | Laser parameter<br>for PMMA  | Intensity: 40%<br>Speed: 35 mm/s |
| Paper model             | Whatman No. 1<br>chromatography<br>paper |             | Hot plate                    | Cole-palmer<br>7"×7"             |
| Flow rate<br>(modified) | 2.24 mm/s                                |             | Heat parameter               | 150 °C, 60 s                     |



Table S2. Design and fabrication parameters of RAPID platform.

| Design             |                                       | Fabrication |            |                        |
|--------------------|---------------------------------------|-------------|------------|------------------------|
| Overall dimensions | 179.66 × mm<br>× 143 mm ×<br>95.23 mm |             | 3D printer | Ultimaker S5           |
| Respond rate       | 76±0.6ms                              |             | Material   | Ultimaker<br>Tough PLA |

Table S3. Models of electronic components used in the RAPID platform.

| <b>Component</b>            | <b>Model</b>       |
|-----------------------------|--------------------|
| Battery module              | Ywrobot            |
| Servo motor of valve driver | Feetech SCS2332    |
| Microcontroller             | Arduino Uno R3     |
| Bluetooth module            | HM-10              |
| Touch screen                | Mzdesign ATF050    |
| Illuminant screen           | WaveShare 0.96 LCD |
| RGB sensor                  | ISL29125           |

Table S4. Raw data for results of specimens tested by RAPID and commercial ELISA.

| <b>Specimen number</b> | <b>Result of RAPID (pg)</b> | <b>Result of commercial ELISA (pg)</b> |
|------------------------|-----------------------------|----------------------------------------|
| 1                      | 282.56                      | 250.65                                 |
| 2                      | 108.24                      | 160.25                                 |
| 3                      | 407.02                      | 436.51                                 |
| 4                      | 227.09                      | 270.85                                 |
| 5                      | 163.18                      | 122.37                                 |
| 6                      | 214.75                      | 305.2                                  |
| 7                      | 26.69                       | 20.62                                  |
| 8                      | 36.28                       | 27.29                                  |
| 9                      | 14.67                       | 18.4                                   |
| 10                     | 13.71                       | 25.07                                  |
| 11                     | 41.15                       | 35.67                                  |
| 12                     | 306.34                      | 401.06                                 |
| 13                     | 198.73                      | 154.9                                  |
| 14                     | 203.83                      | 243.37                                 |
| 15                     | 302.35                      | 348.13                                 |
| 16                     | 208.39                      | 256.83                                 |
| 17                     | 145.23                      | 122.21                                 |
| 18                     | 259.38                      | 214.52                                 |
| 19                     | 202.33                      | 245.29                                 |
| 20                     | 111.53                      | 83.75                                  |
| 21                     | 189.22                      | 181.83                                 |
| 22                     | 289.34                      | 305.2                                  |
| 23                     | 16.33                       | 18.25                                  |
| 24                     | 10.35                       | 14.91                                  |

Table S5. One-test cost of the paper-based chip.

| <b>Item</b>                     | <b>Amount (\$)</b> |
|---------------------------------|--------------------|
| Paper, wax, PMMA, and screw/nut | 0.41               |
| Capture antibody                | 0.47               |
| Blocking buffer                 | 0.08               |
| HRP-conjugated antibody         | 0.02               |
| TMB substrate                   | 0.004              |
| PBS buffer                      | 0.0001             |
| <b>Total</b>                    | <b>0.98</b>        |

Table S6. Cost of the RAPID platform.

| <b>Item</b>              | <b>Amount (\$)</b> |
|--------------------------|--------------------|
| 3D printing material     | 25.50              |
| Electronic components    | 78.67              |
| Other component/material | 3.53               |
| <b>Total</b>             | <b>107.7</b>       |

Table S7. Comparison between our RAPID and the commercial ELISA.

|                             | <b>RAPID</b> | <b>Commercial ELISA</b> |
|-----------------------------|--------------|-------------------------|
| <b>One-test cost</b>        | 0.98 \$      | 13.88 \$                |
| <b>Instrument cost</b>      | 107.7 \$     | Over 3000 \$            |
| <b>Time to result</b>       | 30 min       | 1.5 h                   |
| <b>Sample volume</b>        | 3 $\mu$ L    | 100 $\mu$ L             |
| <b>Portability</b>          | Yes          | No                      |
| <b>Capability of IOT</b>    | Yes          | No                      |
| <b>Sample-in-answer-out</b> | Yes          | No                      |

ELISA is the most widely used analytical assay as it is the gold standard for detecting protein biomarkers in disease-related clinical samples, especially in low-resource settings [1-4]. This work mainly solves the problems of manual pipetting, low reproducibility, low efficiency, and the requirement for trained individuals to operate commercial ELISA. Meanwhile, it provides a feasible solution for early screening of AD. Therefore, we mainly compared the RAPID with commercial ELISA. In addition, commercial ELISA kits typically contain 96 wells (96 experiments). In contrast, our RAPID was the cost of one assay. Therefore, we divided the total reagent price of the commercial ELISA by 96 to obtain the price of a single assay. In addition, we tested 22 artificial plasma samples with RAPID and commercial ELISA. Among them, the commercial ELISA kit results were obtained from plate readers. The RAPID results were obtained from the platform's RGB sensor. Therefore, we also compared the prices of these two readout devices here.

#### References:

- [1] C.-M. Cheng, A.W. Martinez, J. Gong, C.R. Mace, S.T. Phillips, E. Carrilho, K.A. Mirica, G.M. Whitesides, based ELISA, *Angewandte Chemie*, (2010).
- [2] A. Thiha, F. Ibrahim, A colorimetric enzyme-linked immunosorbent assay (ELISA) detection platform for a point-of-care dengue detection system on a lab-on-compact-disc, *Sensors*, 15 (2015) 11431-11441.
- [3] X. Liu, C. Cheng, A. Martinez, K. Mirica, X. Li, S. Phillips, M. Mascarenas, G. Whitesides, A portable microfluidic paper-based device for ELISA, 2011 IEEE 24th international conference on micro electro mechanical systems, IEEE, 2011, pp. 75-78.

[4] R.C. Murdock, L. Shen, D.K. Griffin, N. Kelley-Loughnane, I. Papautsky, J.A. Hagen, Optimization of a paper-based ELISA for a human performance biomarker, *Analytical chemistry*, 85 (2013) 11634-11642.
